# Supplementary material for: Glacial Refugia in Pathogens: European Genetic Structure of Anther Smut Pathogens on Silene latifolia and Silene dioica
Source: PubMed Central journal article supplement (PMC3002987; doi:10.1371/journal.ppat.1001229), 2010-12-16
Supplement: ppat.1001229.s014.pdf [file ppat.1001229.s014.pdf]

Table S1

|      | 694  | 732  | 463  | 507  | 534  | Da   | G    | 796  | 850  | 100b | mi   | 569  | 462  | 782  | 144 |
|------|------|------|------|------|------|------|------|------|------|------|------|------|------|------|-----|
| 694  |      |      |      |      |      |      |      |      |      |      |      |      |      |      |     |
| 732  | 0.77 |      |      |      |      |      |      |      |      |      |      |      |      |      |     |
| 463  | 0.57 | 0.73 |      |      |      |      |      |      |      |      |      |      |      |      |     |
| 507  | 0.79 | 0.91 | 0.64 |      |      |      |      |      |      |      |      |      |      |      |     |
| 534  | 0.53 | 0.67 | 0.13 | 0.52 |      |      |      |      |      |      |      |      |      |      |     |
| Da   | 0.52 | 0.68 | 0.22 | 0.56 | 0.07 |      |      |      |      |      |      |      |      |      |     |
| G    | 0.64 | 0.78 | 0.23 | 0.72 | 0.20 | 0.18 |      |      |      |      |      |      |      |      |     |
| 796  | 0.58 | 0.71 | 0.51 | 0.74 | 0.50 | 0.49 | 0.56 |      |      |      |      |      |      |      |     |
| 850  | 0.74 | 0.87 | 0.71 | 0.90 | 0.70 | 0.68 | 0.77 | 0.67 |      |      |      |      |      |      |     |
| 100b | 0.78 | 0.88 | 0.75 | 0.92 | 0.69 | 0.67 | 0.77 | 0.70 | 0.82 |      |      |      |      |      |     |
| mi   | 0.43 | 0.74 | 0.49 | 0.72 | 0.45 | 0.44 | 0.56 | 0.53 | 0.72 | 0.73 |      |      |      |      |     |
| 569  | 0.73 | 0.89 | 0.67 | 0.89 | 0.66 | 0.66 | 0.75 | 0.65 | 0.83 | 0.90 | 0.68 |      |      |      |     |
| 462  | 0.67 | 0.84 | 0.45 | 0.75 | 0.26 | 0.24 | 0.53 | 0.61 | 0.83 | 0.83 | 0.52 | 0.83 |      |      |     |
| 782  | 0.74 | 0.89 | 0.60 | 0.85 | 0.54 | 0.54 | 0.67 | 0.64 | 0.87 | 0.89 | 0.68 | 0.90 | 0.72 |      |     |
| 144  | 0.56 | 0.74 | 0.51 | 0.72 | 0.52 | 0.53 | 0.56 | 0.54 | 0.69 | 0.72 | 0.52 | 0.31 | 0.65 | 0.71 |     |
