# Supplementary material for: Glacial Refugia in Pathogens: European Genetic Structure of Anther Smut Pathogens on Silene latifolia and Silene dioica
Source: PubMed Central journal article supplement (PMC3002987; doi:10.1371/journal.ppat.1001229), 2010-12-16
Supplement: ppat.1001229.s015.pdf [file ppat.1001229.s015.pdf]

Table S2

|      | 578  | 817  | 692  | 693  | om     | bb   | 829  | 831  | 535  | 514a | 72   | 431b | 460 |
|------|------|------|------|------|--------|------|------|------|------|------|------|------|-----|
| 578  |      |      |      |      |        |      |      |      |      |      |      |      |     |
| 817  | 0.84 |      |      |      |        |      |      |      |      |      |      |      |     |
| 692  | 0.90 | 0.92 |      |      |        |      |      |      |      |      |      |      |     |
| 693  | 0.90 | 0.92 | 0.50 |      |        |      |      |      |      |      |      |      |     |
| om   | 0.83 | 0.80 | 0.71 | 0.74 |        |      |      |      |      |      |      |      |     |
| bb   | 0.79 | 0.76 | 0.64 | 0.69 | -0.01* |      |      |      |      |      |      |      |     |
| 829  | 0.96 | 0.97 | 0.96 | 0.96 | 0.88   | 0.85 |      |      |      |      |      |      |     |
| 831  | 0.83 | 0.78 | 0.76 | 0.76 | 0.71   | 0.67 | 0.80 |      |      |      |      |      |     |
| 535  | 0.78 | 0.76 | 0.84 | 0.84 | 0.74   | 0.70 | 0.90 | 0.79 |      |      |      |      |     |
| 514a | 0.83 | 0.83 | 0.88 | 0.88 | 0.74   | 0.68 | 0.95 | 0.78 | 0.72 |      |      |      |     |
| 72   | 0.73 | 0.71 | 0.81 | 0.81 | 0.68   | 0.62 | 0.90 | 0.77 | 0.66 | 0.31 |      |      |     |
| 431b | 0.83 | 0.82 | 0.83 | 0.83 | 0.70   | 0.64 | 0.92 | 0.77 | 0.70 | 0.47 | 0.41 |      |     |
| 460  | 0.77 | 0.72 | 0.72 | 0.72 | 0.68   | 0.62 | 0.90 | 0.73 | 0.65 | 0.59 | 0.50 | 0.51 |     |
